# Supplementary material for: Knowledge and Attitudes of Turkish Physicians towards Human Monkeypox Disease and Related Vaccination: A Cross-Sectional Study
Source: MDPI journal article supplement (doi:10.3390/vaccines11010019), 2022-12-21
Supplement: s1 [file s1]

**Supplementary Table S1.** English Translation of the Questionnaire.

|                                                                                                                                                                                                                                                                                                                                                                                                                                                                                                                                                                                                                                                                                                                                                                                                                                     |                                                                                                                                                                                                                                                                                                                                                                                                                                                                                                                                                                       |
|-------------------------------------------------------------------------------------------------------------------------------------------------------------------------------------------------------------------------------------------------------------------------------------------------------------------------------------------------------------------------------------------------------------------------------------------------------------------------------------------------------------------------------------------------------------------------------------------------------------------------------------------------------------------------------------------------------------------------------------------------------------------------------------------------------------------------------------|-----------------------------------------------------------------------------------------------------------------------------------------------------------------------------------------------------------------------------------------------------------------------------------------------------------------------------------------------------------------------------------------------------------------------------------------------------------------------------------------------------------------------------------------------------------------------|
| <p>If you have any concerns, questions, and complaints about this study, its risks, benefits, and procedures contact the Protocol Director, Dr. Meliha Cagla Sonmezer at (+90) 505 892 32 78. <i>Independent Contact:</i> If you are not satisfied with how this study is being conducted, or if you have any concerns, complaints, or general questions about the research or your rights as a participant, please contact the Hacettepe University Institutional Review Board to speak to someone independent of the research team at (+90) 312-305-1082 or email at goetik@hacettepe.edu.tr. If you agree to participate in this research, please select "Yes" below.</p>                                                                                                                                                        |                                                                                                                                                                                                                                                                                                                                                                                                                                                                                                                                                                       |
| <p><b>Informed consent</b></p>                                                                                                                                                                                                                                                                                                                                                                                                                                                                                                                                                                                                                                                                                                                                                                                                      |                                                                                                                                                                                                                                                                                                                                                                                                                                                                                                                                                                       |
| <p>We have conducted a survey entitled "<b>Knowledge and Attitudes of Turkish Physicians towards Human Monkeypox Disease and Related Vaccination: A Cross-Sectional Study</b>". The results of the study will represent the knowledge and attitudes of Physicians towards Monkeypox infection vaccinations. The survey may take 10-15 minutes. Nowhere in the survey, you won't be asked for your personal information. All of your information will be kept secret. You have the right to participate or deny, and during the time of participation, you can withdraw yourself from responding. The study will not be benefitted you by money or other compensations but the outcome of the study may consider by the policymakers and take initiative for monkeypox vaccinations in Turkey. Thank you for your participation.</p> |                                                                                                                                                                                                                                                                                                                                                                                                                                                                                                                                                                       |
| Are you willing to participate in the survey?                                                                                                                                                                                                                                                                                                                                                                                                                                                                                                                                                                                                                                                                                                                                                                                       | <input type="radio"/> Yes<br><input type="radio"/> No                                                                                                                                                                                                                                                                                                                                                                                                                                                                                                                 |
| <p><b>Section 1: Sociodemographic data</b></p>                                                                                                                                                                                                                                                                                                                                                                                                                                                                                                                                                                                                                                                                                                                                                                                      |                                                                                                                                                                                                                                                                                                                                                                                                                                                                                                                                                                       |
| 1. Birth year                                                                                                                                                                                                                                                                                                                                                                                                                                                                                                                                                                                                                                                                                                                                                                                                                       | .....                                                                                                                                                                                                                                                                                                                                                                                                                                                                                                                                                                 |
| 2. If you were born before 1980, have you been vaccinated against smallpox or do you have a scar on the left upper arm?                                                                                                                                                                                                                                                                                                                                                                                                                                                                                                                                                                                                                                                                                                             | <input type="radio"/> yes i am vaccinated<br><input type="radio"/> no i'm not vaccinated<br><input type="radio"/> I don't know my vaccination status<br><input type="radio"/> I don't have a vaccination scar<br><input type="radio"/> I have a vaccination scar                                                                                                                                                                                                                                                                                                      |
| 3. Gender                                                                                                                                                                                                                                                                                                                                                                                                                                                                                                                                                                                                                                                                                                                                                                                                                           | <input type="radio"/> Female<br><input type="radio"/> Male                                                                                                                                                                                                                                                                                                                                                                                                                                                                                                            |
| 4. Medical Specialty                                                                                                                                                                                                                                                                                                                                                                                                                                                                                                                                                                                                                                                                                                                                                                                                                | <input type="radio"/> General practitioner<br><input checked="" type="radio"/> Specialist <ul style="list-style-type: none"> <li><input type="radio"/> Internal medicine</li> <li><input type="radio"/> Pulmonology</li> <li><input type="radio"/> Infectious Disease</li> <li><input type="radio"/> Family medicine</li> <li><input type="radio"/> Pediatrics</li> <li><input type="radio"/> Emergency medicine</li> <li><input type="radio"/> Intensive care</li> <li><input type="radio"/> Surgery</li> <li><input type="radio"/> Other (write in text)</li> </ul> |
| 5. Medical practice experience                                                                                                                                                                                                                                                                                                                                                                                                                                                                                                                                                                                                                                                                                                                                                                                                      | <input type="radio"/> Less than 1 year,<br><input type="radio"/> 1-5 years<br><input type="radio"/> 5-10 years<br><input type="radio"/> 10-20 years<br><input type="radio"/> >20 years                                                                                                                                                                                                                                                                                                                                                                                |
| 6. Received information of human Monkeypox during medical education                                                                                                                                                                                                                                                                                                                                                                                                                                                                                                                                                                                                                                                                                                                                                                 | <input type="radio"/> Yes                                                                                                                                                                                                                                                                                                                                                                                                                                                                                                                                             |

|                                                                                                                       |                                                                                                                                                                                                                                                                                                                                                      |
|-----------------------------------------------------------------------------------------------------------------------|------------------------------------------------------------------------------------------------------------------------------------------------------------------------------------------------------------------------------------------------------------------------------------------------------------------------------------------------------|
|                                                                                                                       | <input type="radio"/> No                                                                                                                                                                                                                                                                                                                             |
| 7. Heard about human Monkeypox before                                                                                 | <input type="radio"/> Yes<br><input type="radio"/> No                                                                                                                                                                                                                                                                                                |
| 8. First time you heard information about Monkeypox                                                                   | <input type="radio"/> Within several days or weeks ago<br><input type="radio"/> Within last month or later<br><input type="radio"/> I did not hear about it                                                                                                                                                                                          |
| 9. Have you been affected by the COVID-19 disease?                                                                    | <input type="radio"/> Yes<br><input type="radio"/> No                                                                                                                                                                                                                                                                                                |
| 10. Worry from Monkeypox compared to COVID-19                                                                         | <input type="radio"/> Much worried with the COVID-19<br><input type="radio"/> Much worried with Monkeypox<br><input type="radio"/> Similar worries with Monkeypox and COVID-19                                                                                                                                                                       |
| 11. If you much worried with Monkeypox;<br>Main reasons for your worry from Monkeypox disease                         | <input type="radio"/> Self and family worry of Monkeypox infection<br><input type="radio"/> Worry from another worldwide pandemic<br><input type="radio"/> Worried that Monkeypox might surge to cause a national lockdown<br><input type="radio"/> Concerned that an international flight suspension happens<br><input type="radio"/> Other worries |
| 12. Have you gotten all COVID-19 vaccine shots ?                                                                      | <input type="radio"/> Yes<br><input type="radio"/> No                                                                                                                                                                                                                                                                                                |
| 13. Which of the following sources will you choose to derive monkeypox virus -related information? (multiple choices) | <input type="radio"/> TV and radio<br><input type="radio"/> Social media<br><input type="radio"/> Family or friend<br><input type="radio"/> Books<br><input type="radio"/> Research articles                                                                                                                                                         |
| <b>Section 2: Knowledge</b>                                                                                           |                                                                                                                                                                                                                                                                                                                                                      |
| 1. Monkeypox is a new infection that appeared this year 2022                                                          | <input type="radio"/> Correct<br><input type="radio"/> Incorrect<br><input type="radio"/> Do not know                                                                                                                                                                                                                                                |
| 2. Monkeypox is a sexually transmitted disease                                                                        | <input type="radio"/> Correct<br><input type="radio"/> Incorrect<br><input type="radio"/> Do not know                                                                                                                                                                                                                                                |
| 3. Monkeypox is transmitted to humans through the bites and scratches from infected animals.                          | <input type="radio"/> Correct<br><input type="radio"/> Incorrect<br><input type="radio"/> Do not know                                                                                                                                                                                                                                                |

|                                                                                                                                            |                                                                                                       |
|--------------------------------------------------------------------------------------------------------------------------------------------|-------------------------------------------------------------------------------------------------------|
| 4. Monkeypox is easily transmitted from one person to another                                                                              | <input type="radio"/> Correct<br><input type="radio"/> Incorrect<br><input type="radio"/> Do not know |
| 5. Monkeypox is spread by droplets (coughing and sneezing)                                                                                 | <input type="radio"/> Correct<br><input type="radio"/> Incorrect<br><input type="radio"/> Do not know |
| 6. Monkeypox only affects males.                                                                                                           | <input type="radio"/> Correct<br><input type="radio"/> Incorrect<br><input type="radio"/> Do not know |
| 7. Hand sanitizers and face masks are important in preventing monkeypox                                                                    | <input type="radio"/> Correct<br><input type="radio"/> Incorrect<br><input type="radio"/> Do not know |
| 8. Monkeypox is prevalent in middle eastern countries                                                                                      | <input type="radio"/> Correct<br><input type="radio"/> Incorrect<br><input type="radio"/> Do not know |
| 9. Monkeypox is a bacterial disease infection                                                                                              | <input type="radio"/> Correct<br><input type="radio"/> Incorrect<br><input type="radio"/> Do not know |
| 10. Monkeypox and smallpox have similar signs and symptoms                                                                                 | <input type="radio"/> Correct<br><input type="radio"/> Incorrect<br><input type="radio"/> Do not know |
| 11. Monkeypox and chickenpox have similar signs and symptoms                                                                               | <input type="radio"/> Correct<br><input type="radio"/> Incorrect<br><input type="radio"/> Do not know |
| 12. Papules, rashes and vesicles on the skin are one of the signs or symptoms of human monkeypox                                           | <input type="radio"/> Correct<br><input type="radio"/> Incorrect<br><input type="radio"/> Do not know |
| 13. Lymphadenopathy (swollen lymph nodes) is one clinical sign or symptom that could be used to differentiate monkeypox and smallpox cases | <input type="radio"/> Correct<br><input type="radio"/> Incorrect<br><input type="radio"/> Do not know |
| 14. There is a specific vaccine for monkeypox                                                                                              | <input type="radio"/> Correct<br><input type="radio"/> Incorrect<br><input type="radio"/> Do not know |
| 15. Monkeypox virus causes milder disease in children (<14 years) than adults                                                              | <input type="radio"/> Correct<br><input type="radio"/> Incorrect<br><input type="radio"/> Do not know |

|                                                                                                  |                                                                                                                                                                      |
|--------------------------------------------------------------------------------------------------|----------------------------------------------------------------------------------------------------------------------------------------------------------------------|
| 16. What is the monkeypox virus case fatality rate in the general population?                    | <input type="radio"/> 0-11 %<br><input type="radio"/> 12-20 %<br><input type="radio"/> 21-30 %<br><input type="radio"/> 31-40 %<br><input type="radio"/> Do not know |
| 17. There is a specific treatment for monkeypox                                                  | <input type="radio"/> Correct<br><input type="radio"/> Incorrect<br><input type="radio"/> Do not know                                                                |
| 18. The chickenpox vaccine I got in childhood protects me from monkeypox                         | <input type="radio"/> Correct<br><input type="radio"/> Incorrect<br><input type="radio"/> Do not know                                                                |
| 19. There is a smallpox vaccine that can be used for monkeypox                                   | <input type="radio"/> Correct<br><input type="radio"/> Incorrect<br><input type="radio"/> Do not know                                                                |
| 20. People can be vaccinated after exposure to monkeypox virus to help prevent monkeypox disease | <input type="radio"/> Correct<br><input type="radio"/> Incorrect<br><input type="radio"/> Do not know                                                                |
| <b>Section 3: Attitude</b>                                                                       |                                                                                                                                                                      |
| 1. I am confident that the world's population can control the monkeypox worldwide                | <input type="radio"/> Disagree<br><input type="radio"/> Undecided<br><input type="radio"/> Agree                                                                     |
| 2. I am interested in learning more about monkeypox                                              | <input type="radio"/> Disagree<br><input type="radio"/> Undecided<br><input type="radio"/> Agree                                                                     |
| 3. I think that it is not dangerous to travel to the countries epidemic with monkeypox           | <input type="radio"/> Disagree<br><input type="radio"/> Undecided<br><input type="radio"/> Agree                                                                     |
| 4. I think monkeypox will not affect social and economic life like the COVID- 19 pandemic        | <input type="radio"/> Disagree<br><input type="radio"/> Undecided<br><input type="radio"/> Agree                                                                     |
| 5. I think that monkeypox cannot add new burden on healthcare system of the affected countries   | <input type="radio"/> Disagree<br><input type="radio"/> Undecided<br><input type="radio"/> Agree                                                                     |
| <b>4. Vaccination Willingness</b>                                                                |                                                                                                                                                                      |
| 1. I'm considering getting the smallpox vaccine to prevent monkeypox viral infection             | <input type="radio"/> Disagree<br><input type="radio"/> Undecided<br><input type="radio"/> Agree                                                                     |

|                                                                                                                                                      |                                                                                                  |
|------------------------------------------------------------------------------------------------------------------------------------------------------|--------------------------------------------------------------------------------------------------|
| 2. The monkeypox infection has been alleviated, and there is no need to be vaccinated against monkeypox infection.                                   | <input type="radio"/> Disagree<br><input type="radio"/> Undecided<br><input type="radio"/> Agree |
| 3. I am worried about the possible side effects of vaccination against monkeypox infection                                                           | <input type="radio"/> Disagree<br><input type="radio"/> Undecided<br><input type="radio"/> Agree |
| 4. The recommendation for the vaccination against monkeypox infection by doctors, the community and other professionals has a great influence on me. | <input type="radio"/> Disagree<br><input type="radio"/> Undecided<br><input type="radio"/> Agree |
| 5. If the country provides the vaccination against monkeypox infection for free, I am willing to be vaccinated.                                      | <input type="radio"/> Disagree<br><input type="radio"/> Undecided<br><input type="radio"/> Agree |

#### Section 5. Anxiety

| Over the last 2 weeks, how often have you been bothered by the following problems? |                                                                                                                                                                   |
|------------------------------------------------------------------------------------|-------------------------------------------------------------------------------------------------------------------------------------------------------------------|
| 1. Feeling nervous, anxious or on edge                                             | <input type="radio"/> Not at all<br><input type="radio"/> Several days<br><input type="radio"/> More than half the days<br><input type="radio"/> Nearly every day |
| 2. Not being able to stop or control worrying                                      | <input type="radio"/> Not at all<br><input type="radio"/> Several days<br><input type="radio"/> More than half the days<br><input type="radio"/> Nearly every day |
| 3. Worrying too much about different things                                        | <input type="radio"/> Not at all<br><input type="radio"/> Several days<br><input type="radio"/> More than half the days<br><input type="radio"/> Nearly every day |
| 4. Trouble relaxing                                                                | <input type="radio"/> Not at all<br><input type="radio"/> Several days<br><input type="radio"/> More than half the days<br><input type="radio"/> Nearly every day |
| 5. Being so restless that it is hard to sit still                                  | <input type="radio"/> Not at all<br><input type="radio"/> Several days<br><input type="radio"/> More than half the days<br><input type="radio"/> Nearly every day |
| 6. Becoming easily annoyed or irritable                                            | <input type="radio"/> Not at all<br><input type="radio"/> Several days<br><input type="radio"/> More than half the days<br><input type="radio"/> Nearly every day |
| 7. Feeling afraid as if something awful might happen                               | <input type="radio"/> Not at all                                                                                                                                  |

|  |                                                                                                                                 |
|--|---------------------------------------------------------------------------------------------------------------------------------|
|  | <ul style="list-style-type: none"> <li>○ Several days</li> <li>○ More than half the days</li> <li>○ Nearly every day</li> </ul> |
|--|---------------------------------------------------------------------------------------------------------------------------------|

**Supplementary Table S2.** Respondents' attitudes, beliefs and concerns about Monkeypox disease (n = 283).

| Statement                                                                                       | Response                  | Total N (%) |
|-------------------------------------------------------------------------------------------------|---------------------------|-------------|
| A1. I am confident that the world's population can control the monkeypox worldwide              | Agree                     | 126 (44.5)  |
|                                                                                                 | Neither agree or disagree | 124 (43.8)  |
|                                                                                                 | Disagree                  | 33 (11.7)   |
| A2. I am interested in learning more about monkeypox                                            | Agree                     | 229 (80.9)  |
|                                                                                                 | Neither agree or disagree | 37(13.1)    |
|                                                                                                 | Disagree                  | 17 (6.0)    |
| A3. I think that it is not dangerous to travel to the countries epidemic with monkeypox         | Agree                     | 77 (27.2)   |
|                                                                                                 | Neither agree or disagree | 85 (30.0)   |
|                                                                                                 | Disagree                  | 121 (42.8)  |
| A4. I think monkeypox will not affect social and economic life like the COVID- 19 pandemic      | Agree                     | 163 (57.6)  |
|                                                                                                 | Neither agree or disagree | 73 (25.8)   |
|                                                                                                 | Disagree                  | 47 (16.6)   |
| A5. I think that monkeypox cannot add new burden on healthcare system of the affected countries | Agree                     | 58 (20.5)   |
|                                                                                                 | Neither agree or disagree | 72 (25.4)   |
|                                                                                                 | Disagree                  | 153 (54.1)  |
| <b>The General Anxiety Disorder 7-item scale</b>                                                |                           |             |
| 1. Feeling nervous, anxious or on edge                                                          | Not at all                | 93 (32.9)   |
|                                                                                                 | Several days              | 126 (44.5)  |
|                                                                                                 | More than half the days   | 28 (9.9)    |
|                                                                                                 | Nearly every day          | 36 (12.7)   |
| 2. Not being able to stop or control worrying                                                   | Not at all                | 149 (52.7)  |
|                                                                                                 | Several days              | 99 (35)     |
|                                                                                                 | More than half the days   | 23 (8.1)    |
|                                                                                                 | Nearly every day          | 12 (4.2)    |
| 3. Not being able to stop or control worrying                                                   | Not at all                | 87 (30.7)   |
|                                                                                                 | Several days              | 145 (51.2)  |
|                                                                                                 | More than half the days   | 27 (9.5)    |
|                                                                                                 | Nearly every day          | 24 (8.5)    |
| 4. Trouble relaxing                                                                             | Not at all                | 117 (41.3)  |
|                                                                                                 | Several days              | 120 (42.4)  |
|                                                                                                 | More than half the days   | 24 (8.5)    |
|                                                                                                 | Nearly every day          | 22 (7.8)    |
| 5. Being so restless that it is hard to sit still                                               | Not at all                | 167 (59.0)  |
|                                                                                                 | Several days              | 84 (29.7)   |
|                                                                                                 | More than half the days   | 19 (6.7)    |
|                                                                                                 | Nearly every day          | 13 (4.6)    |
| 6. Becoming easily annoyed or irritable                                                         | Not at all                | 124 (43.8)  |
|                                                                                                 | Several days              | 115 (40.6)  |
|                                                                                                 | More than half the days   | 23 (8.1)    |
|                                                                                                 | Nearly every day          | 21 (7.4)    |
| 7. Feeling afraid as if something awful might happen                                            | Not at all                | 155 (54.8)  |
|                                                                                                 | Several days              | 94 (33.2)   |
|                                                                                                 | More than half the days   | 17 (6.0)    |
|                                                                                                 | Nearly every day          | 17 (6.0)    |

|                                                                                                 |                           |            |
|-------------------------------------------------------------------------------------------------|---------------------------|------------|
| A1. I am confident that the world's population can control the monkeypox worldwide              | Agree                     | 126 (44.5) |
|                                                                                                 | Neither agree or disagree | 124 (43.8) |
|                                                                                                 | Disagree                  | 33 (11.7)  |
| A2. I am interested in learning more about monkeypox                                            | Agree                     | 229 (80.9) |
|                                                                                                 | Neither agree or disagree | 37(13.1)   |
|                                                                                                 | Disagree                  | 17 (6.0)   |
| A3. I think that it is not dangerous to travel to the countries epidemic with monkeypox         | Agree                     | 77 (27.2)  |
|                                                                                                 | Neither agree or disagree | 85 (30.0)  |
|                                                                                                 | Disagree                  | 121 (42.8) |
| A4. I think monkeypox will not affect social and economic life like the COVID- 19 pandemic      | Agree                     | 163 (57.6) |
|                                                                                                 | Neither agree or disagree | 73 (25.8)  |
|                                                                                                 | Disagree                  | 47 (16.6)  |
| A5. I think that monkeypox cannot add new burden on healthcare system of the affected countries | Agree                     | 58 (20.5)  |
|                                                                                                 | Neither agree or disagree | 72 (25.4)  |
|                                                                                                 | Disagree                  | 153 (54.1) |
| <b>The General Anxiety Disorder 7-item scale</b>                                                |                           |            |
| 1. Feeling nervous, anxious or on edge                                                          | Not at all                | 93 (32.9)  |
|                                                                                                 | Several days              | 126 (44.5) |
|                                                                                                 | More than half the days   | 28 (9.9)   |
|                                                                                                 | Nearly every day          | 36 (12.7)  |
| 2. Not being able to stop or control worrying                                                   | Not at all                | 149 (52.7) |
|                                                                                                 | Several days              | 99 (35)    |
|                                                                                                 | More than half the days   | 23 (8.1)   |
|                                                                                                 | Nearly every day          | 12 (4.2)   |
| 3. Not being able to stop or control worrying                                                   | Not at all                | 87 (30.7)  |
|                                                                                                 | Several days              | 145 (51.2) |
|                                                                                                 | More than half the days   | 27 (9.5)   |
|                                                                                                 | Nearly every day          | 24 (8.5)   |
| 4. Trouble relaxing                                                                             | Not at all                | 117 (41.3) |
|                                                                                                 | Several days              | 120 (42.4) |
|                                                                                                 | More than half the days   | 24 (8.5)   |
|                                                                                                 | Nearly every day          | 22 (7.8)   |
| 5. Being so restless that it is hard to sit still                                               | Not at all                | 167 (59.0) |
|                                                                                                 | Several days              | 84 (29.7)  |
|                                                                                                 | More than half the days   | 19 (6.7)   |
|                                                                                                 | Nearly every day          | 13 (4.6)   |
| 6. Becoming easily annoyed or irritable                                                         | Not at all                | 124 (43.8) |
|                                                                                                 | Several days              | 115 (40.6) |
|                                                                                                 | More than half the days   | 23 (8.1)   |
|                                                                                                 | Nearly every day          | 21 (7.4)   |
| 7. Feeling afraid as if something awful might happen                                            | Not at all                | 155 (54.8) |
|                                                                                                 | Several days              | 94 (33.2)  |
|                                                                                                 | More than half the days   | 17 (6.0)   |
|                                                                                                 | Nearly every day          | 17 (6.0)   |
